# Supplementary material
Source: PubMed Central journal article supplement (PMC4135640)
Supplement: JB.01811-14_zjb999093263so1.pdf [file JB.01811-14_zjb999093263so1.pdf]

## 1 **Supplementary Information**

2

### 3 **Bacterial strains and plasmid construction**

4 The partitioning operons from the following plasmids were synthesized by Epoch Life  
5 Sciences ([www.epochlifescience.com](http://www.epochlifescience.com)): pCoo, CP-933T\_UT, CP-933T, pKPN4, pADAP,  
6 pCP301, pAPEC. Both the R1, and R478 par operon was amplified directly from  
7 pKG503 (from Kenn Gerdes, University of Newcastle, UK) and R478 native plasmid  
8 (from Diane Taylor, University of Alberta, Canada) using primers oEMH1 + oEMH2,  
9 and oEMH53 + oEMH54 respectively. The pB171 Par operon was derived from pGE103  
10 (1) (from Kenn Gerdes) and amplified using primers oEMH47 and oEMH48. The pSK41  
11 Par operon, and the pCTX-M3 par operon were amplified from pSK9001 (2) and  
12 pJMB14 (3) respectively using primer pairs oEMH51 + oEMH52, and oEMH147 +  
13 oEMH148. pSK9001 and pJMB14 were provided by Neville Firth (University of Sydney,  
14 Australia) and Grazyna Jagura-Burdzy (Polish Academy of Sciences, Poland)  
15 respectively. All forward primers for amplification of homologous par sequences  
16 contained 20bp of identical sequence, and likewise for the reverse primers. This allowed  
17 the use of the same primer pair for subsequent cloning and manipulations (see below).

18 Plasmid pEMH606 was derived from a mini version of F1 plasmid, pDAG203 (4)  
19 provided by Jean-Ives Bouet (University of Toulouse, France) Initially the restriction  
20 sites SpeI and SacII were inserted into the pDAG302 plasmid upstream of the *ResD* ORF,  
21 by insertional PCR, simultaneously removing the *ccdA* and *ccdB\** genes. The Lac  
22 promoter and LacZ gene were amplified from the *E. coli* chromosome using primers  
23 oEMH338 and EMH339, and the Lac terminator was amplified using primers oEMH340

24 + oEMH341 respectively. Fusion PCR, was used to piece these fragments together to  
25 generate a LacZ gene that was inserted into pDAG203 at SpeI and SacII sites, creating  
26 pEMH606. To generate versions of pEMH606 containing the different partitioning  
27 operons, the restriction sites AflIII and AvrII were synthetically inserted into pEMH606  
28 using PCR, simultaneously removing the *rpl* gene. Partitioning operons were amplified  
29 with primers oEMH293 + oEMH294 containing AvrII and AflIII sites, and ligated into  
30 pEMH606.

31 The challenge plasmids, series pEMH14x, where x is a number 0-13 are synthetic,  
32 and were constructed using ligation independent cloning (5) with four unique DNA  
33 molecules encoding 1. a Par operon, 2. the replication origin from plasmid  
34 pMB1(*oriMB1*), 3. the kanamycin resistance gene from pET28a (Merck, Darnstadt,  
35 Germany) and 4. green fluorescent protein (GFP) coding sequence optimized for  
36 expression in *E. coli*.

37 pB171 and pCP301 chimeric partitioning operons were assembled using fusion  
38 PCR, and amplified with oEMH293 and oEMH294 before cloning into pEMH606 at  
39 AflIII and AvrII sites.

40 *parC* mKate reporter constructs (plasmid series pEMH700 to pEMH707) were  
41 generated by fusion PCR, whereby the gene encoding the red fluorescent protein, mKate,  
42 was amplified from the oriR1, Amp<sup>R</sup> plasmid, pPM195 (provided by Per Malkus,  
43 Harvard Medical School), and both the *parC* promoters and 3'UTRs of either pCP301 or  
44 pB171 par operons amplified from pEMH608 and pEMH617 respectively. Each reporter  
45 was amplified with primers oEMH498 and oEMH499 containing NheI and EagI  
46 restriction sites respectively, and cloned into pPM195 digested with the same enzymes.

47 The plasmid pPM70 was obtained from Per Malkus (Harvard Medical School) and  
48 contains the *ori* SC101-ts\* (6), Amp<sup>R</sup> gene, and RNA1 promoter driving expression of  
49 green fluorescent protein (GFP). This plasmid was used as the backbone to express Par  
50 proteins of both pB171 and pCP301 partitioning operons from this RNA1 promoter.  
51 Initially the GFP coding sequence was removed from pPM70 using restriction enzymes  
52 BamHI and XbaI. Next the required Par proteins were amplified with primers containing  
53 both these restriction sites, and ligated into the pPM70-digested backbone.

54 C-terminally His<sub>6</sub>-tagged ParR expression plasmids were constructed by inserting either  
55 the pB171 ParR ORF or pCP301 ParR ORF at the BamHI and NotI sites of pET21a to create the  
56 plasmids pEMH535 and pEMH536. pB171 ParR was amplified with primers oEMH538 and  
57 oEMH540, and pCP301 ParR was amplified with primers oEMH539 and oEMH541.  
58 Table S2 summarizes the names and important features of all plasmids used in this study.  
59 All plasmid and primer sequences are available upon request.

60

### 61 **Kinetic model of pB171 and pCP301 Partition Incompatibility**

62

63 Since plasmid loss is a probabilistic process involving molecules present in  
64 very small numbers per cell, a stochastic approach is appropriate. We use first-  
65 order chemical kinetics to model association and dissociation between *parC* and  
66 ParR prior to cell division, simulating long enough so the final state samples from the  
67 steady state distribution, implemented using Gillespie's stochastic simulation  
68 algorithm The reactions modeled are:

69

70

(1)

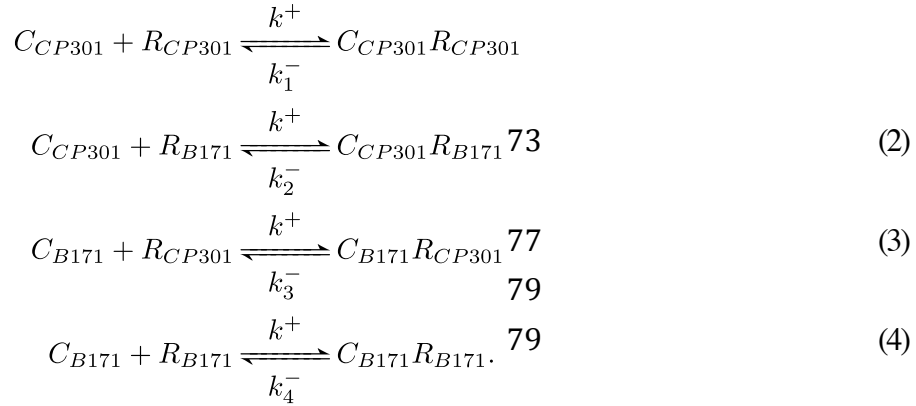

We include two kinds of plasmid,  $C_{CP301} = parC_{pCP301}$ , and  $C_{B171} = parC_{pB171}$ , and likewise two ParR binding proteins,  $R_{CP301}$  and  $R_{B171}$ . The model's  $R$  is a proxy for the complex of the number of ParR molecules that must bind a  $parC$  element to enable it to interact with and stabilize ParM filaments, rather than a single ParR. We take the binding constants  $k^+$  to be identical, but the unbinding constants to be distinct for different pairs, leading to different steady-state binding probabilities. Modeling these reactions as first-order kinetics means that each reaction takes place at a rate given by the number (Equivalent to concentration as we model cell volume as fixed) of each ingredient present, multiplied by the reaction rate. For example if there are  $C_1$  copies of plasmid 1 not bound to ParR, and  $R_A$  copies of ParR complexes not bound to plasmids,  $C_1R_A$  complexes are formed proportional to the number of free pairs:  $k^+ [C_1] [R_A]$ .

We take the total  $parC$  and ParR numbers per cell to be constant, so that production and degradation of ParR, and replication of  $parC$ , are excluded from the model. The total count of R complexes is fixed at 2x that of cognate  $parC$ ; we performed simulations varying this ratio, and found no significant differences in loss rate as long as the total R complex count is greater than the  $parC$  count (Fig S7).

The initial state has all  $parC$ -ParR's unbound, and we run the simulation for 100x longer than the reciprocal of any of the rate constants, so that the final state retains no

106 memory of the initial conditions. For figure 4, we simulated 10,000 mother cells for each  
 107 combination of parameters.

108 Due to the low diffusion rates of plasmids, the time for a plasmid at one end of the  
 109 cell to diffuse away from that end is comparable to the generation time. Since filament  
 110 extension is fast,  $3 \mu\text{m}/\text{min}$  *in vitro* (7), we do not explicitly model filament formation,  
 111 extension or dissociation. Instead we model segregation by assigning *parC*s to daughters  
 112 probabilistically depending on their binding state. When we stop the simulation, unpaired  
 113 *parC*'s are binomially distributed between daughters with equal probability. *parC*'s bound  
 114 to ParR's of a given species are paired uniformly at random, and one plasmid from each  
 115 pair assigned to each daughter; if there are an odd number then the last is assigned to one  
 116 daughter at random.

117 Dissociation rates were estimated from the RFP binding assay in Figure S2, using  
 118 the stochastic model of *parC*-ParR binding. Precisely, in the association-dissociation  
 119 reaction:

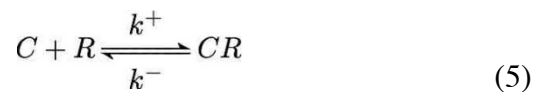

120  
 121  
 122  
 123  
 124  
 125  
 126  
 127  
 128  
 129 assume the total number of *parC*'s present is fixed, comprised of free *parC*'s and those  
 130 bound to ParR,  $[C] + [CR]$ . Then the proportion of *parC* unbound is:

$$p = \frac{[C]}{[C] + [CR]} \quad (6)$$

131  
 132  
 133  
 134  
 135  
 136  
 137  
 138  
 139  
 140 At equilibrium,

$$k^+[C][R] = k^-[CR] \quad (7)$$

143

144

145 where again [R] is the count of free ParR, so

146

148

150

152

$$\frac{k^-}{k^+[R]} = \frac{147p}{1-p} \quad (8)$$

153 An estimate of the count of free ParR-complexes in the experimental conditions

154 measured is thus necessary for an estimate of the (relative) reaction rates.

155 Utilizing RFP reporter constructs whose expression was driven by *parC* promoter

156 sequences, we determined the level of fluorescence in the presence of constitutive

157 amounts of ParR protein, since ParR binding to *parC* represses expression. This value,

158 reported in figure S2, is a proxy for the proportion of ParR bound to *parC*. As we

159 simulated with a 2x ratio of total ParR complexes to *parC*, for mathematical simplicity

160 we approximated the count of free ParR complexes as equal to the *parC* copy number. In

161 these experiments there were roughly 3-5 copies of *parC* present, so we approximate [R]

162 total as 8 copies per cell. This approximation further assumes that the same R complex

163 that mediates segregation is the single unit that mediates repression. The numerical

164 values reported are in Table S3.

165

165 **References**

- 166 **1. Ebersbach, G., and K. Gerdes.** 2001. The double par locus of virulence factor  
167 pB171: DNA segregation is correlated with oscillation of ParA. *Proc. Natl. Acad. Sci. U.*  
168 *S. A.* **98**:15078-15083. doi: 10.1073/pnas.261569598.
- 169 **2. Schumacher, M. A., T. C. Glover, A. J. Brzoska, S. O. Jensen, T. D. Dunham, R.**  
170 **A. Skurray, and N. Firth.** 2007. Segrosome structure revealed by a complex of ParR  
171 with centromere DNA. *Nature.* **450**:1268-1271. doi: 10.1038/nature06392.
- 172 **3. Mierzejewska, J., A. Kulinska, and G. Jagura-Burdzy.** 2007. Functional analysis of  
173 replication and stability regions of broad-host-range conjugative plasmid CTX-M3 from  
174 the IncL/M incompatibility group. *Plasmid.* **57**:95-107. doi:  
175 10.1016/j.plasmid.2006.09.001.
- 176 **4. Lemonnier, M., J. Y. Bouet, V. Libante, and D. Lane.** 2000. Disruption of the F  
177 plasmid partition complex in vivo by partition protein SopA. *Mol. Microbiol.* **38**:493-  
178 505.
- 179 **5. Aslanidis, C., and P. J. de Jong.** 1990. Ligation-independent cloning of PCR products  
180 (LIC-PCR). *Nucleic Acids Res.* **18**:6069-6074.
- 181 **6. Hamilton, C. M., M. Aldea, B. K. Washburn, P. Babitzke, and S. R. Kushner.**  
182 1989. New method for generating deletions and gene replacements in *Escherichia coli*. *J.*  
183 *Bacteriol.* **171**:4617-4622.
- 184 **7. Garner, E. C., C. S. Campbell, and R. D. Mullins.** 2004. Dynamic instability in a  
185 DNA-segregating prokaryotic actin homolog. *Science.* **306**:1021-1025. doi:  
186 10.1126/science.1101313.

| Native Plasmid Name | Host Species                 | Native Plasmid Name | Host Species                |
|---------------------|------------------------------|---------------------|-----------------------------|
| R1                  | <i>Salmonella enterica</i>   | pADAP               | <i>Serratia entomophila</i> |
| pB171               | <i>Escherichia coli</i>      | pAPEC-O2-R          | <i>Escherichia coli</i>     |
| pCP301              | <i>Shigella flexneri</i>     | pCoo                | <i>Escherichia coli</i>     |
| pSK41               | <i>Staphylococcus aureus</i> | CP 933T_UT          | <i>E. coli, UT 189/UPEC</i> |
| R478                | <i>Serratia marcescens</i>   | CP-933T             | <i>E. coli, O157:H7</i>     |
| pKPN4               | <i>Klebsiella pneumoniae</i> | pCTX-M3             | <i>Citrobacter freundii</i> |

**Table S1.** The native plasmids and their bacterial hosts encoding the homologous Par operons utilized in this study.



**Table S2:** Plasmids used in this study.

| Plasmid                                                                             | Replicon ( <i>ori</i> ) | Drug Resistance Marker | Par Elements                                             | Promoter driving Par Elements | Relevant Figure | Source               |
|-------------------------------------------------------------------------------------|-------------------------|------------------------|----------------------------------------------------------|-------------------------------|-----------------|----------------------|
| pEMH606                                                                             | F1                      | Cm <sup>R</sup>        | -                                                        | -                             | Figure 1c       | This study           |
| pEMH607                                                                             | F1                      | Cm <sup>R</sup>        | R1 ParMRC                                                | R1 Par                        | Figure 1c       | This study           |
| pEMH608                                                                             | F1                      | Cm <sup>R</sup>        | pCP301 ParMRC                                            | pCP301 Par                    | Figure 2b       | This study           |
| pEMH617                                                                             | F1                      | Cm <sup>R</sup>        | pB171 ParMRC                                             | pB171 Par                     | Figure 2b       | This study           |
| pEMH515                                                                             | F1                      | Cm <sup>R</sup>        | R478 ParMRC                                              | R478 Par                      | Figure 2b       | This study           |
| pEMH516                                                                             | F1                      | Cm <sup>R</sup>        | pCP301 ParMRC                                            | pCP301 Par                    | Figure 2b       | This study           |
| pEMH517                                                                             | F1                      | Cm <sup>R</sup>        | pADAP ParMRC                                             | pADAP Par                     | Figure 2b       | This study           |
| pEMH518                                                                             | F1                      | Cm <sup>R</sup>        | CP-933T ParMRC                                           | CP-933T Par                   | Figure 2b       | This study           |
| pEMH519                                                                             | F1                      | Cm <sup>R</sup>        | pCoo ParMRC                                              | pCoo Par                      | Figure 2b       | This study           |
| pEMH520                                                                             | F1                      | Cm <sup>R</sup>        | pKPN4 ParMRC                                             | pKPN4 Par                     | Figure 2b       | This study           |
| pEMH521                                                                             | F1                      | Cm <sup>R</sup>        | pCT-MX3 ParMRC                                           | pCT-MX3 Par                   | Figure 2b       | This study           |
| pEMH522                                                                             | F1                      | Cm <sup>R</sup>        | pAPEC ParMRC                                             | pAPEC Par                     | Figure 2b       | This study           |
| pEMH523                                                                             | F1                      | Cm <sup>R</sup>        | pSK41 ParMRC                                             | pSK41 Par                     | Figure 2b       | This study           |
| pEMH524                                                                             | F1                      | Cm <sup>R</sup>        | CP-933T_UT ParMRC                                        | CP-933T_UT Par                | Figure 2b       | This study           |
| pEMH140                                                                             | pMB1                    | Kan <sup>R</sup>       | -                                                        | -                             | Figure 1c       | This study           |
| pEMH141                                                                             | pMB1                    | Kan <sup>R</sup>       | R1 ParMRC                                                | R1 Par                        | Figure 1c       | This study           |
| pEMH142                                                                             | pMB1                    | Kan <sup>R</sup>       | pSK41 ParMRC                                             | pSK41 Par                     | Figure 2b       | This study           |
| pEMH143                                                                             | pMB1                    | Kan <sup>R</sup>       | pB171 ParMRC                                             | pB171 Par                     | Figure 2b       | This study           |
| pEMH144                                                                             | pMB1                    | Kan <sup>R</sup>       | R478 ParMRC                                              | R478 Par                      | Figure 2b       | This study           |
| pEMH146                                                                             | pMB1                    | Kan <sup>R</sup>       | pCT-MX3 ParMRC                                           | pCT-MX3 Par                   | Figure 2b       | This study           |
| pEMH147                                                                             | pMB1                    | Kan <sup>R</sup>       | pCP301 ParMRC                                            | pCP301 Par                    | Figure 2b       | This study           |
| pEMH149                                                                             | pMB1                    | Kan <sup>R</sup>       | pADAP ParMRC                                             | pADAP Par                     | Figure 2b       | This study           |
| pEMH1410                                                                            | pMB1                    | Kan <sup>R</sup>       | pKPN4 ParMRC                                             | pKPN4 Par                     | Figure 2b       | This study           |
| pEMH1413                                                                            | pMB1                    | Kan <sup>R</sup>       | CP-933T_UT ParMRC                                        | CP-933T_UT Par                | Figure 2b       | This study           |
| pEMH627                                                                             | F1                      | Cm <sup>R</sup>        | C(301)R(301)M(171)                                       | pCP301 Par                    | Figure 3a       | This study           |
| pEMH624                                                                             | F1                      | Cm <sup>R</sup>        | C(301)R(171)M(301)                                       | pCP301 Par                    | Figure 3a       | This study           |
| pEMH633                                                                             | F1                      | Cm <sup>R</sup>        | C(171)R(301)M(301)                                       | pCP301 Par                    | Figure 3a       | This study           |
| pEMH625                                                                             | F1                      | Cm <sup>R</sup>        | C(171)R(171)M(301)                                       | pB171 Par                     | Figure 3a       | This study           |
| pEMH623                                                                             | F1                      | Cm <sup>R</sup>        | C(171)R(301)M(171)                                       | pB171 Par                     | Figure 3a       | This study           |
| pEMH632                                                                             | F1                      | Cm <sup>R</sup>        | C(171)R(301)M(171)                                       | pB171 Par                     | Figure 3a       | This study           |
| pEMH531                                                                             | F1                      | Cm <sup>R</sup>        | pCP301 <i>parC</i>                                       | -                             | Figure 3b       | This study           |
| pPM70                                                                               | SC101-ts*               | Amp <sup>R</sup>       | -                                                        | -                             | Figure 3b       | Per Malkus           |
| pEMH611                                                                             | SC101-ts*               | Amp <sup>R</sup>       | pB171 ParRM                                              | RNA1pr_1%**                   | Figure 3b       | This study           |
| pEMH640                                                                             | pMB1                    | Kan <sup>R</sup>       | pCP301 <i>parC</i>                                       | -                             | Figure 5a       | This study           |
| pEMH639                                                                             | pMB1                    | Kan <sup>R</sup>       | pB171 <i>parC</i>                                        | -                             | Figure 5a       | This study           |
| pEMH644                                                                             | SC101-ts*               | Amp <sup>R</sup>       | pCP301 ParR                                              | RNA1pr_1%                     | Figure 5b       | This study           |
| pEMH645                                                                             | SC101-ts*               | Amp <sup>R</sup>       | pB171 ParR                                               | RNA1pr_1%                     | Figure 5b       | This study           |
| pTRG                                                                                | ColE1                   | Tet <sup>R</sup>       | -                                                        | -                             | Figure S2/S4    | Agilent Technologies |
| pEMH653                                                                             | ColE1                   | Tet <sup>R</sup>       | pCP301 ParR                                              | RNA1pr_100%‡                  | Figure S4       | This study           |
| pEMH654                                                                             | ColE1                   | Tet <sup>R</sup>       | pB171 ParR                                               | RNA1pr_1%                     | Figure S2/S4    | This study           |
| pEMH655                                                                             | ColE1                   | Tet <sup>R</sup>       | pCP301 ParR                                              | RNA1pr_1%                     | Figure S2/S4    | This study           |
| pEMH656                                                                             | ColE1                   | Tet <sup>R</sup>       | pB171 ParR                                               | RNA1pr_100%                   | Figure S4       | This study           |
| * = temperature sensitive SC101 <i>ori</i> , stable at <30°C (Hamilton et al. 1989) |                         |                        |                                                          |                               |                 |                      |
| ** = Mutant form of RNA1 promoter with relative expression strength ~ 1%            |                         |                        |                                                          |                               |                 |                      |
| ‡ = Non-mutant RNA1 promoter with relative expression strength ~ 100%               |                         |                        |                                                          |                               |                 |                      |
| Plasmid                                                                             | Replicon ( <i>ori</i> ) | Drug Resistance Marker | Reporter Construct                                       |                               | Relevant Figure | Source               |
| pEMH700                                                                             | R1                      | Amp <sup>R</sup>       | pCP301 <i>parC</i> , mKate, pCP301 ParR, pCP301 3'UTR    |                               | Figure 3c       | This study           |
| pEMH701                                                                             | R1                      | Amp <sup>R</sup>       | pCP301 <i>parC</i> , mKate, pCP301 3'UTR                 |                               | Figure 3c       | This study           |
| pEMH702                                                                             | R1                      | Amp <sup>R</sup>       | pCP301 <i>parC</i> , mKate, pB171 ParR, pCP301 3'UTR     |                               | Figure 3c       | This study           |
| pEMH703                                                                             | R1                      | Amp <sup>R</sup>       | pCP301 <i>parC</i> , mKate, pB171 ParR_K6E, pCP301 3'UTR |                               | Figure 3c       | This study           |
| pEMH704                                                                             | R1                      | Amp <sup>R</sup>       | pB171 <i>parC</i> , mKate, pB171 ParR, pB171             |                               | Figure 3c       | This study           |

|                |    |                  |                                                           |           |            |
|----------------|----|------------------|-----------------------------------------------------------|-----------|------------|
|                |    |                  | 3'UTR                                                     |           |            |
| <b>pEMH705</b> | R1 | Amp <sup>R</sup> | pB171 <i>parC</i> , mKate, pB171 ParR_K6E,<br>pB171 3'UTR | Figure 3c | This study |
| <b>pEMH706</b> | R1 | Amp <sup>R</sup> | pB171 <i>parC</i> , mKate, pB171 3'UTR                    | Figure 3c | This study |
| <b>pEMH707</b> | R1 | Amp <sup>R</sup> | pB171 <i>parC</i> , mKate, pCP301 ParR, pB171<br>3'UTR    | Figure 3c | This study |

| Parameter | <i>parC</i> -ParR identity                           | p(unbound) | $k^-/k^+[R]$ |
|-----------|------------------------------------------------------|------------|--------------|
| $k_1^-$   | <i>parC</i> <sub>CP301</sub> - ParR <sub>CP301</sub> | 9.60%      | 0.11         |
| $k_2^-$   | <i>parC</i> <sub>CP301</sub> - ParR <sub>B171</sub>  | 32.60%     | 0.48         |
| $k_3^-$   | <i>parC</i> <sub>B171</sub> - ParR <sub>CP301</sub>  | 82%        | 1.86         |
| $k_4^-$   | <i>parC</i> <sub>B171</sub> - ParR <sub>B171</sub>   | 14.60%     | 0.17         |

**Table S3: Parameters used for plasmid segregation simulations.**

Since we only have relative estimates of  $k^-/k^+$ , in our simulation units of time were defined so that the association rate  $k^+ = 1$ , and the other parameters were scaled accordingly.

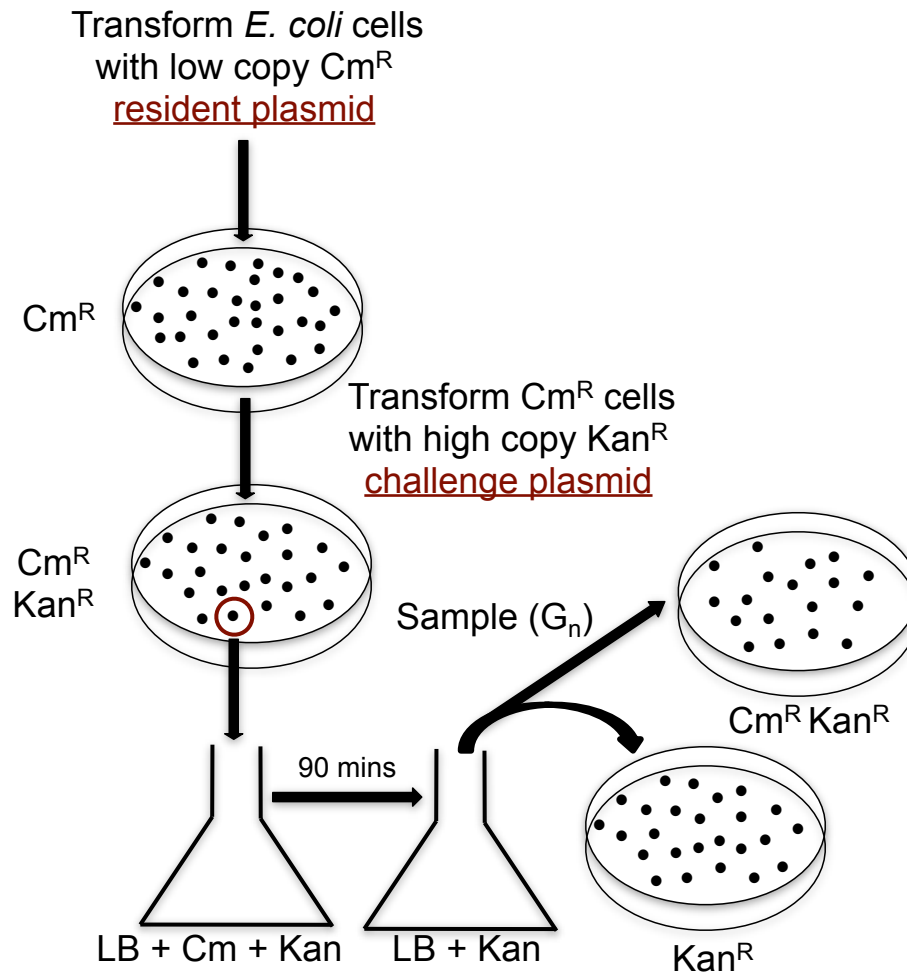

**Figure S1. Plasmid incompatibility assay.** Schematic of the plasmid compatibility assay undertaken in the study. Initially DH5alpha cells are transformed with the low copy chloramphenicol resistant (Cm<sup>R</sup>) resident plasmid. Transformants are then transformed with the higher copy kanamycin resistant (Kan<sup>R</sup>) challenge plasmid and transformants are selected on LB plates containing both chloramphenicol and kanamycin. A single colony is then grown for 90mins in the presence of both drugs, transferred to media containing only kanamycin to select for the challenge plasmid, and grown for approximately 70 generations. At various intervals during this time, the population is sampled and plated on media containing kanamycin alone or kanamycin and chloramphenicol. The fraction of doubly resistant colonies (Cm<sup>R</sup>Kan<sup>R</sup>) to Kan<sup>R</sup> colonies is determined and the loss rate of the Cm<sup>R</sup> resident plasmid is determined.

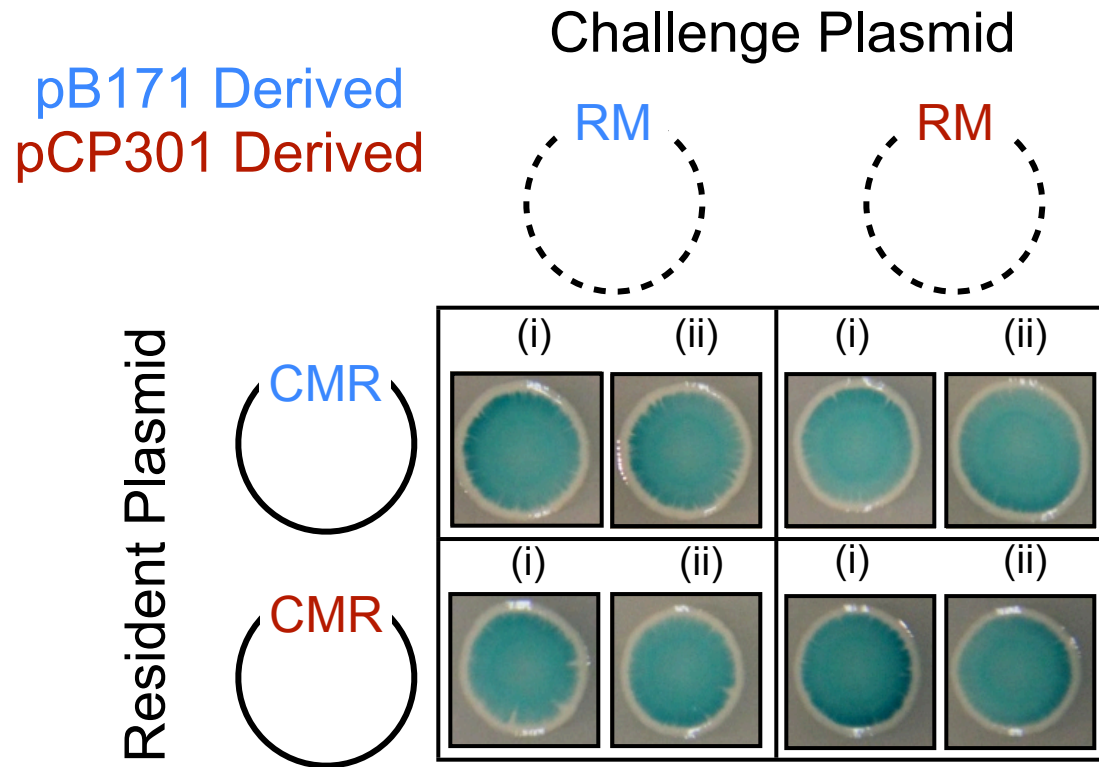

**Figure S2. The requirement of *parC* sequence to mediate incompatibility.** Qualitative plasmid incompatibility assay for strains containing the indicated plasmids, showing that the resident plasmid was not lost for all combinations tested. (i) and (ii) denote two independent transformants of the same strain for comparison.

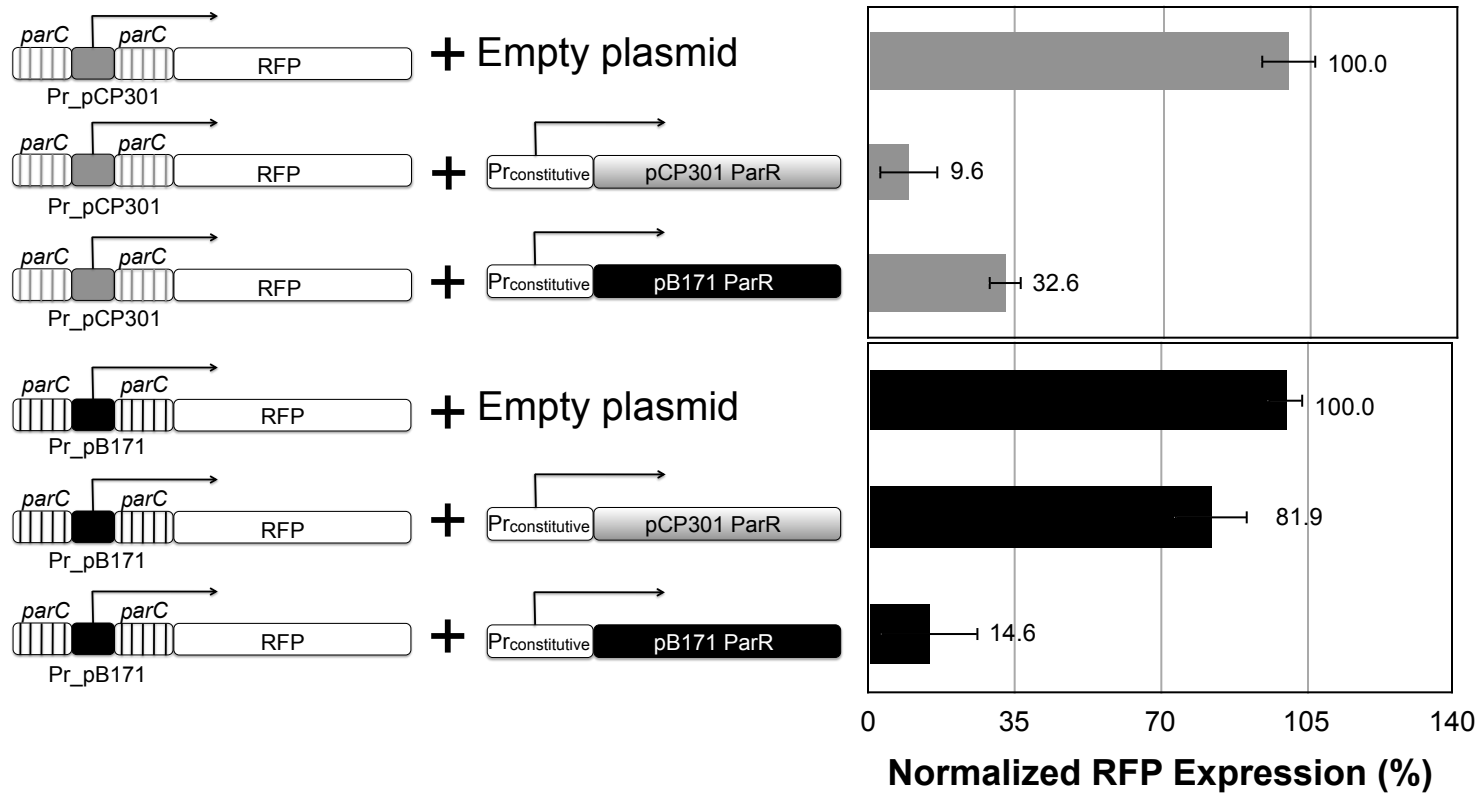

**Figure S3. The binding of ParR proteins to *parC* DNA *in trans*.** RFP fluorescence reporter assay for cells containing either the RFP gene expressed from the pCP301 promoter (Pr\_pCP301) or pB171 promoter (Pr\_pB171), in addition to a second plasmid encoding either ParR<sub>pCP301</sub>, or ParR<sub>pB171</sub> from a constitutive promoter (RNA1 promoter). An empty plasmid control is used to normalize all fluorescence data. Data represents the mean fluorescence, as determined by flow cytometry, of each strain. Error bars represent the standard deviation derived from six independent transformants of both the reporter plasmids and the ParR expressing plasmids.

A.

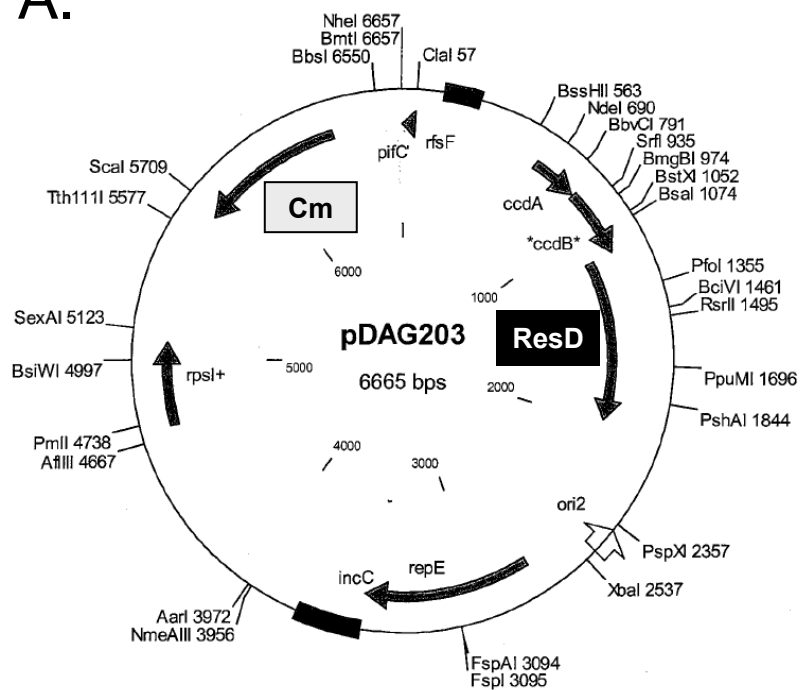

B.

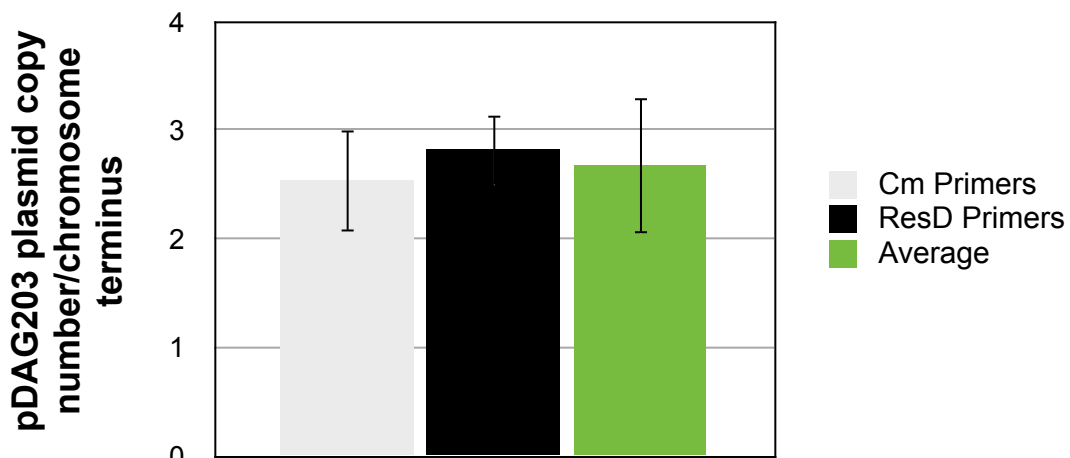

**Figure S4. Copy number determination of oriF1 pDAG203 plasmid.** **A.** Plasmid map of pDAG203 indicating the positions of the chloramphenicol (Cm) gene and resolvase (ResD) gene. **B.** Quantitative PCR analysis of DNA extracted from cells harboring pDAG203 using two primer pairs amplifying either the Cm or ResD genes.

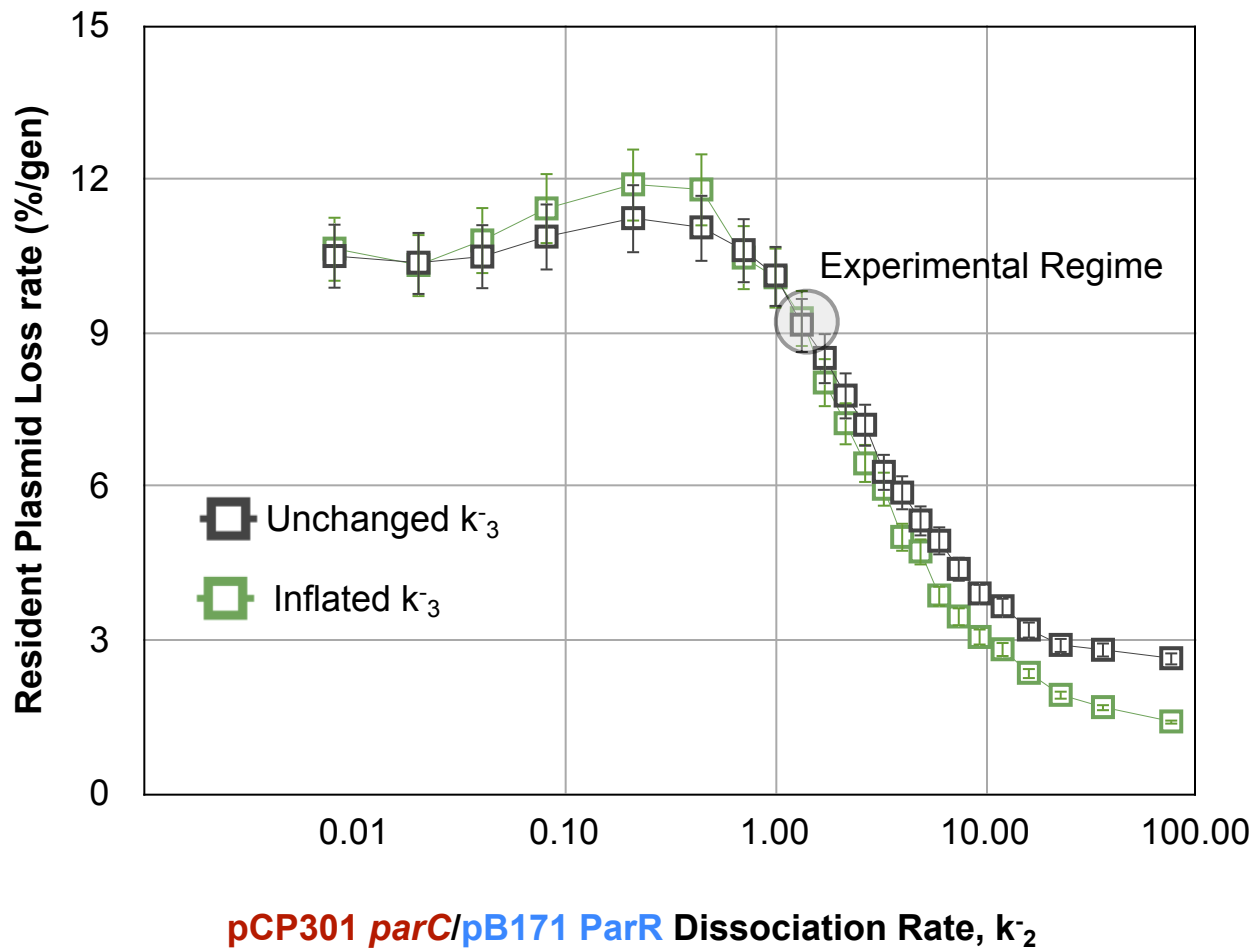

**Figure S5.** The incompatibility between a resident  $\text{Par}_{\text{pCP301}}$  plasmid, and  $\text{Par}_{\text{pB171}}$  challenge plasmid was simulated by our kinetic model under a range of values for  $k_2$  (the dissociation rate of  $\text{ParR}_{\text{pB171}}$  binding to  $\text{parC}_{\text{pCP301}}$ ) to determine the dependence of our model on  $k_2$ . The contribution of the dissociation rate of  $\text{ParR}_{\text{pCP301}}$  binding to  $\text{parC}_{\text{pB171}}$  (rate  $k_3$ ), to resident plasmid loss rate was also monitored by inflating the value of  $k_3$  to a highly unfavorable value. In all simulations for this panel, resident and challenge plasmid copy numbers were set at 3 and 15 respectively. The experimentally determined value for  $k_2$  is highlighted for comparison. Error bars represent the 95% confidence interval.



**A.** *parC* sequence alignment:

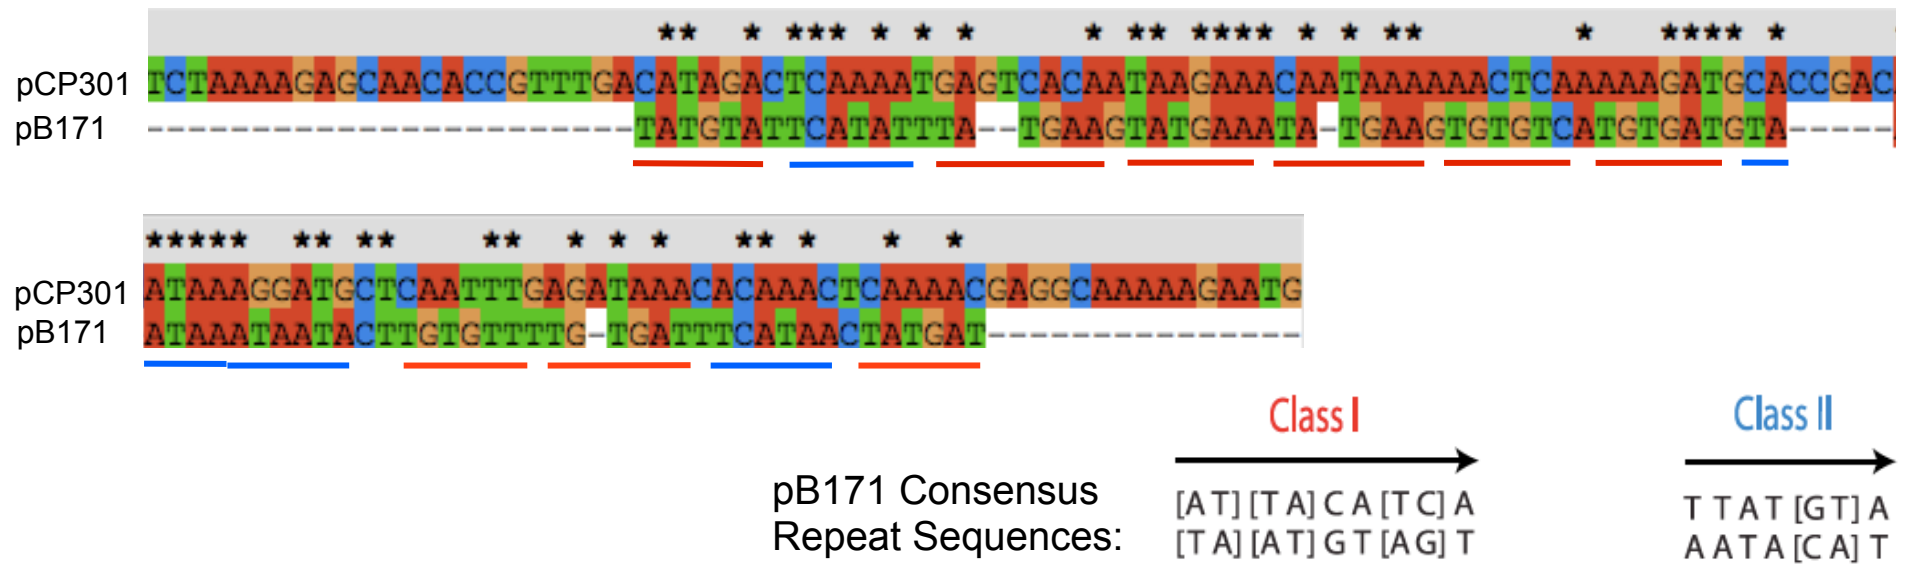

**B.** ParR N-terminus sequence alignment:

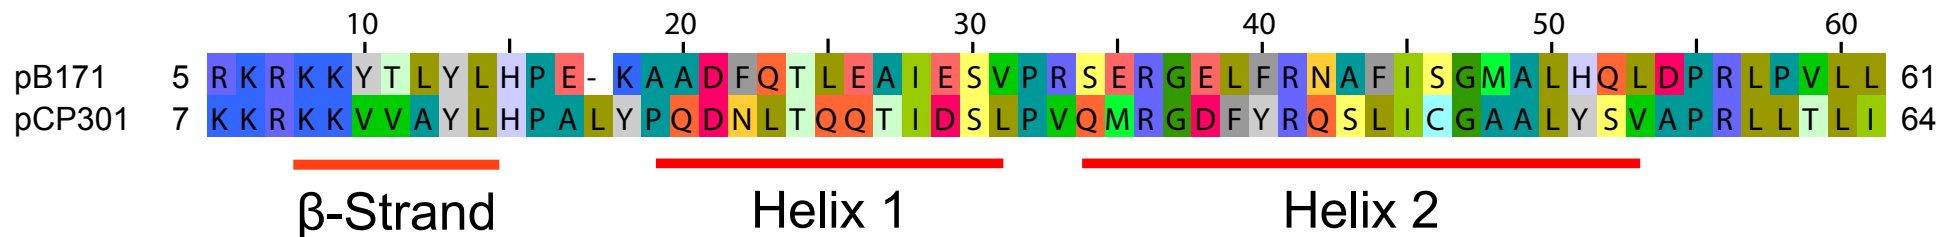

**Figure S6. Sequence comparisons of pB171 and pCP301 *parC* and ParR.** **A.** The *parC* sequence from both pB171 and pCP301 par operons were aligned using CLUSTALW. (\* = identical bases between both sequences). The pB171 consensus repeat sequences, as determined by Ringgard, S. *et al* 2007 are also shown, and the relevant sequences are underlined in the alignment in either red, to denote the class I consensus sequence, or in blue, to denote the class II consensus sequence. **B.** Alignment of the N terminal portions of ParR from pB171 and pCP301. Amino acids are colored according to their chemical properties and the regions that form the  $\beta$ -strand, Helix 1 and Helix 2, which comprise the DNA-interacting interface are underlined.

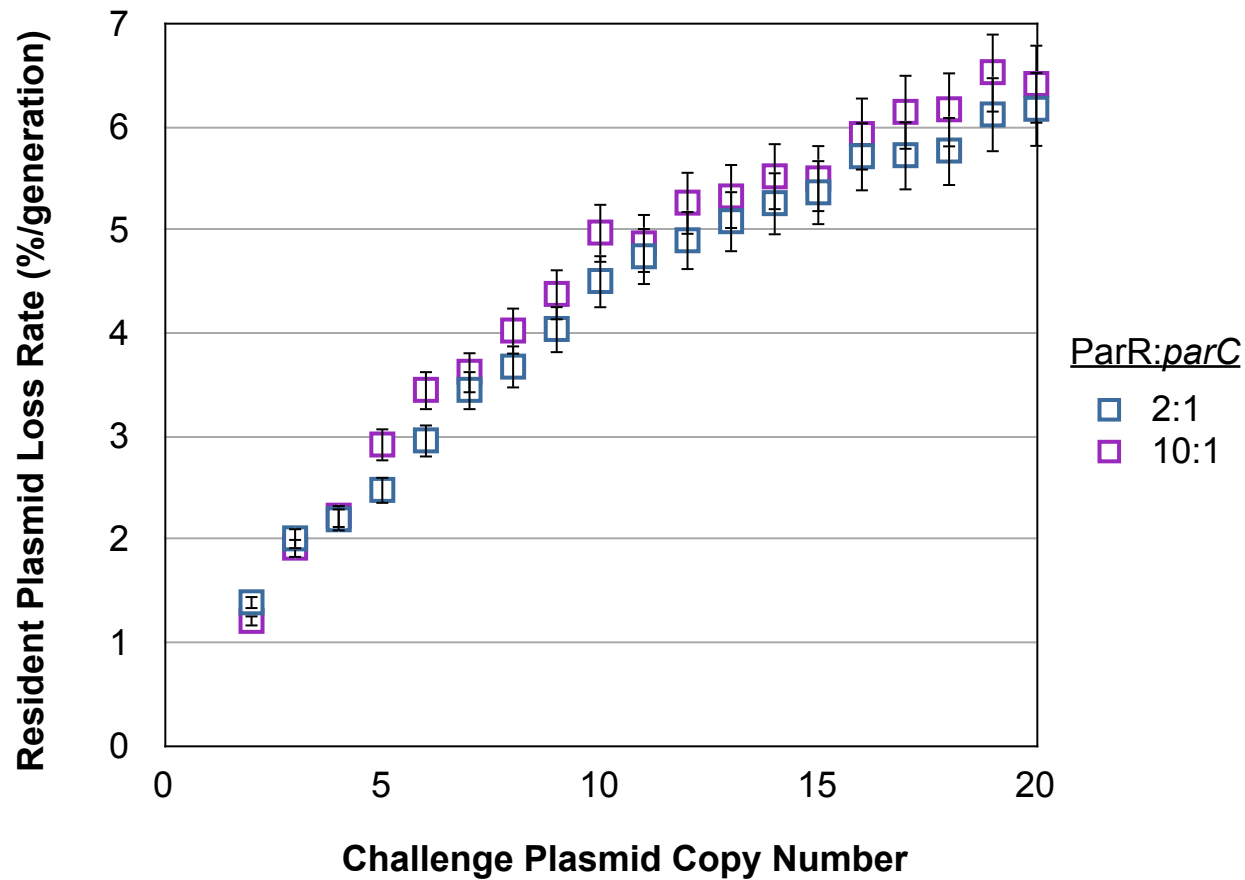

**Figure S7.** The incompatibility between a resident  $\text{Par}_{\text{PCP301}}$  plasmid, and  $\text{Par}_{\text{PB171}}$  challenge plasmid was simulated by our kinetic model under a range of values for the copy number of the  $\text{Par}_{\text{PB171}}$  challenge plasmid. The sensitivity of our model to the ratio between ParR complexes and *parC* DNA of both resident and challenge plasmids was tested by comparing the loss rates of the resident plasmid under two regimes, where this ratio was either 2:1 or 10:1.  $p_{\text{unbound}}$  values are as follows:  $k_1=3.0\%$ ,  $k_2=38.5\%$ ,  $k_3=55.2\%$ , and  $k_4=47.2\%$ . Data indicate that there is no significant difference between these two situations. Error bars represent the 95% confidence interval.
